# Supplementary material for: Rsd balances (p)ppGpp level by stimulating the hydrolase activity of SpoT during carbon source downshift in Escherichia coli
Source: PubMed Central journal article supplement — Proc Natl Acad Sci U S A. 2018 Jun 18;115(29):E6845–54. doi: 10.1073/pnas.1722514115 (PMC6055147; doi:10.1073/pnas.1722514115), 2018-06-18
Supplement: pnas.1722514115.sapp.pdf [file pnas.1722514115.sapp.pdf]

**Rsd balances (p)ppGpp level by stimulating the hydrolase activity of SpoT during  
carbon source downshift in *Escherichia coli***

Jae-Woo Lee<sup>1†</sup>, Young-Ha Park<sup>2†</sup>, Yeong-Jae Seok<sup>1,2\*</sup>

<sup>1</sup>Department of Biophysics and Chemical Biology, Seoul National University, Seoul 08826,  
Republic of Korea

<sup>2</sup>School of Biological Sciences and Institute of Microbiology, Seoul National University,  
Seoul 08826, Republic of Korea

<sup>†</sup>These authors equally contributed to this work.

\*Corresponding author: Tel: 82-2-880-8827; E-mail: yjseok@snu.ac.kr

**Supporting Information**

**Tables S1 and S2**

**Figures S1 – S10**

**Supplementary references**

**Table S1. Bacterial strains and plasmids used in this study**

| Strain or plasmid                 | Genotype or phenotype                                                                                                                                                                                  | Source              |
|-----------------------------------|--------------------------------------------------------------------------------------------------------------------------------------------------------------------------------------------------------|---------------------|
| <b>Strains</b>                    |                                                                                                                                                                                                        |                     |
| MG1655                            | WT <i>E. coli</i> K-12                                                                                                                                                                                 | (1)                 |
| ER2566                            | F <sup>-</sup> λ <sup>-</sup> <i>fhuA2</i> [ <i>Jon</i> ] <i>ompT lacZ::T7 gene 1 gal sulA11</i><br><i>Δ(mcrC-mrr)114::IS10 R(mcr-73::miniTn10-TetS)2</i><br><i>R(zgb-210::Tn10)(TetS) endA1 [dcm]</i> | New England Biolabs |
| BTH101                            | F <sup>-</sup> , <i>cya-99, araD139, galE15, galK16, rpsL1</i> (Str <sup>R</sup> ),<br><i>hsdR2, mcrA1, mcrB1</i>                                                                                      | (2)                 |
| MG1655Δ <i>rsd</i>                | MG1655 <i>rsd::Tet<sup>R</sup></i>                                                                                                                                                                     | (3)                 |
| MG1655Δ <i>relA</i> Δ <i>spoT</i> | MG1655 <i>relA::Km<sup>R</sup>, spoT::Cm<sup>R</sup></i>                                                                                                                                               | This study          |
| MG1655Δ <i>relA</i>               | MG1655 <i>relA::Km<sup>R</sup></i>                                                                                                                                                                     | This study          |
| MG1655Δ <i>relA</i> Δ <i>rsd</i>  | MG1655 <i>relA::Km<sup>R</sup>, rsd::tet<sup>R</sup></i>                                                                                                                                               | This study          |
| GI698                             | F <sup>-</sup> λ <sup>-</sup> <i>lacI<sup>q</sup> lacPL8 ampC::P<sub>trp</sub> cl</i>                                                                                                                  | (4)                 |
| <b>Plasmids</b>                   |                                                                                                                                                                                                        |                     |
| pETDuet-1                         | Cloning vector; Amp <sup>R</sup>                                                                                                                                                                       | Novagen             |
| pET-HisRsd                        | pETDuet-1-derived expression vector for His-Rsd                                                                                                                                                        | (3)                 |
| pET-Rsd                           | pETDuet-1-derived expression vector for Rsd                                                                                                                                                            | (3)                 |
| pET-SpoTC1                        | pETDuet-1-derived expression vector for truncated<br>version of SpoT (384-702)                                                                                                                         | This study          |
| pET-SpoTN2                        | pETDuet-1-derived expression vector for truncated<br>version of SpoT (1-447)                                                                                                                           | This study          |
| pUT18C                            | ColEI-ori, <i>P<sub>lac</sub>::cyaA 225–399</i> , encoding <i>B. pertussis</i><br>CyaA T18 fragment, Amp <sup>R</sup>                                                                                  | (5)                 |
| pUT18C-zip                        | ColEI-ori, <i>P<sub>lac</sub>::cyaA 225–399</i> φGCN4-zip, Amp <sup>R</sup>                                                                                                                            | (6)                 |
| pUT18C-Rsd                        | Contains <i>E. coli</i> Rsd fused to <i>B. pertussis</i> CyaA T18<br>fragment, Amp <sup>R</sup>                                                                                                        | This study          |
| pUT18C-Rsd(D63A)                  | Asp63 was mutated to Ala in pUT18C-Rsd                                                                                                                                                                 | This study          |
| pUT18C-SpoT                       | Contains <i>E. coli</i> SpoT fused to <i>B. pertussis</i> CyaA T18<br>fragment, Amp <sup>R</sup>                                                                                                       | This study          |
| pKT25                             | ori p15A, <i>P<sub>lac</sub>::cyaA 1–224</i> , encoding <i>B. pertussis</i> CyaA<br>T25 fragment, Km <sup>R</sup>                                                                                      | (5)                 |
| pKT25-zip                         | ori p15A, <i>P<sub>lac</sub>::cyaA 1–224</i> φGCN4-zip, Km <sup>R</sup>                                                                                                                                | (7)                 |
| pKT25-Rsd                         | Contains <i>E. coli</i> Rsd fused to <i>B. pertussis</i> CyaA T25<br>fragment, Km <sup>R</sup>                                                                                                         | This study          |
| pKT25-SpoT                        | Contains <i>E. coli</i> SpoT fused to <i>B. pertussis</i> CyaA T25<br>fragment, Km <sup>R</sup>                                                                                                        | This study          |
| pKT25-SpoTN1                      | Contains <i>E. coli</i> SpoT (1-347) fused to <i>B. pertussis</i> CyaA<br>T25 fragment, Km <sup>R</sup>                                                                                                | This study          |
| pKT25-SpoTC1                      | Contains <i>E. coli</i> SpoT (384-702) fused to <i>B. pertussis</i><br>CyaA T25 fragment, Km <sup>R</sup>                                                                                              | This study          |
| pKT25-SpoTN2                      | Contains <i>E. coli</i> SpoT (1-447) fused to <i>B. pertussis</i> CyaA<br>T25 fragment, Km <sup>R</sup>                                                                                                | This study          |
| pKT25-SpoTC2                      | Contains <i>E. coli</i> SpoT (448-702) fused to <i>B. pertussis</i><br>CyaA T25 fragment, Km <sup>R</sup>                                                                                              | This study          |
| pKT25-RelA                        | Contains <i>E. coli</i> RelA fused to <i>B. pertussis</i> CyaA T25<br>fragment, Km <sup>R</sup>                                                                                                        | This study          |
| pKT25-EIIA <sup>Ntr</sup>         | Contains <i>E. coli</i> EIIA <sup>Ntr</sup> fused to <i>B. pertussis</i> CyaA T25<br>fragment, Km <sup>R</sup>                                                                                         | Gift from CR Lee    |
| pKT25-EIIA <sup>Ntr</sup> (H73A)  | His73 was mutated to Ala in pKT25-EIIA <sup>Ntr</sup>                                                                                                                                                  | Gift from CR Lee    |

|                                  |                                                                                                        |                  |
|----------------------------------|--------------------------------------------------------------------------------------------------------|------------------|
| pKT25-EIIA <sup>Ntr</sup> (H73E) | His73 was mutated to Glu in pKT25-EIIA <sup>Ntr</sup>                                                  | Gift from CR Lee |
| pGEX-4T-1                        | Cloning vector; Amp <sup>R</sup>                                                                       | GE Healthcare    |
| pGEX-SpoT                        | pGEX-4T-1–derived expression vector for GST-SpoT                                                       | This study       |
| pJK1113                          | pBAD24 with <i>oriT</i> of RP4 and <i>nptI</i> , P <sub>BAD</sub> ; Km <sup>R</sup> , Amp <sup>R</sup> | (8)              |
| pJK1113-Rsd                      | pJK1113-derived expression vector for Rsd, Km <sup>R</sup> , Amp <sup>R</sup>                          | This study       |
| pJK1113-HPr(H15A)                | pJK1113-derived expression vector for HPr (His15 to Ala), Km <sup>R</sup> , Cm <sup>R</sup>            | This study       |
| pKD46                            | Red recombinase expression plasmid under the control of arabinose inducible promoter                   | (9)              |
| pRE1                             | Expression vector under control of λP <sub>L</sub> promoter, Amp <sup>R</sup>                          | (10)             |
| pRE-HisEIIA <sup>Ntr</sup>       | pRE1-based expression vector for His-EIIA <sup>Ntr</sup>                                               | (11)             |
| pRE-HIcrr                        | pRE1-based expression vector for HPr, EI and EIIA <sup>Glc</sup>                                       | (12)             |
| pACYC184                         | A low copy number cloning vector; Cm <sup>R</sup> Tet <sup>R</sup>                                     | (13)             |
| pACYC-HPr                        | <i>E. coli ptsH</i> promoter and its ORF cloned between SphI and Sall sites of pACYC184                | (12)             |
| pACYC-Rsd                        | <i>E. coli rsd</i> promoter and its ORF cloned between BamHI and SphI sites of pACYC184                | (3)              |
| pACYC-Rsd(D63A)                  | Asp63 was mutated to Ala in pACYC-Rsd                                                                  | This study       |

**Table S2. Oligonucleotides used in this study**

| <b>Name</b> | <b>Oligonucleotide sequence (5'-3')</b>       | <b>Use(s)</b>                     |
|-------------|-----------------------------------------------|-----------------------------------|
| RS925       | AGTTCGCATATGGAATTTATCGAGAGCGTTAAATC (NdeI)    | Construction of pET-SpoTC1        |
| RS926       | GTTCATAAACTCGAGATTTTCGGTTTTCGGGTGAC (XhoI)    | Construction of pET-SpoTN2        |
| RS927       | AGCGGGCCATGGCCTTGTATCTGTTTGAAAGCCTG (NcoI)    | Construction of pUT18C-Rsd        |
| RS928       | CGACAAAGAATTCCTTACCAAGCGGCATTCGGGCGA (EcoRI)  | Construction of pUT18C-Rsd(D63A)  |
| RS929       | ACAAACTTGCGGAGGATCCCATGCTTAACC (BamHI)        | Construction of pUT18C-SpoT       |
| RS930       | CTGCGCTGTAAAGAATTCATTTACATTCAA (EcoRI)        | Construction of pKT25-Rsd         |
| RS931       | TTGTCAGAGCCTGGTCGCTTACTTGTCTGCCGGAC           | Construction of pKT25-SpoT        |
| RS932       | GTCCGGCAGACAAGTAAGCGACCAGGCTCTGACAA           | Construction of pKT25-SpoT        |
| RS933       | CAAAGCGGGGATCCCTTGTATCTGTTTGAAAGCCT (BamHI)   | Construction of pKT25-SpoTN1      |
| RS934       | CCCAACACGTTATGCACGCATGAATTCATGCTCG (EcoRI)    | Construction of pKT25-SpoTC1      |
| RS935       | ACAAACTTGCGGAGGATCCCATGCTTAACC (BamHI)        | Construction of pKT25-SpoTN2      |
| RS936       | CTGCGCTGTAAAGAATTCATTTACATTCAA (EcoRI)        | Construction of pKT25-SpoTC2      |
| RS937       | CAAAGCGGGGATCCCTTGTATCTGTTTGAAAGCCT (BamHI)   | Construction of pKT25-RelA        |
| RS938       | CCCAACACGTTATGCACGCATGAATTCATGCTCG (EcoRI)    | Construction of pGEX-SpoT         |
| RS939       | AGCGGGGGATCCATTGTATCTGTTTGAAAGCCTG (BamHI)    | Construction of pJK1113-Rsd       |
| RS940       | ATTTGTGAATTCGTACTTTAGGTTTCGCCGTGCTC (EcoRI)   | Construction of pJK1113-HPr(H15A) |
| RS941       | GATCTCGGATCCATTCCCGGATGAGATTTACG (BamHI)      | Construction of pACYC-Rsd         |
| RS942       | GTTTCATGAATTCCTTAATTTTCGGTTTTCGGGTGAC (EcoRI) |                                   |
| RS943       | AGCGGGGGATCCATTGTATCTGTTTGAAAGCCTG (BamHI)    |                                   |
| RS944       | AGCGCCGAATTCCTTAGGTAATGATTTCAACGGTT (EcoRI)   |                                   |
| RS945       | GAAATCGGATCCAGCTCCGGGCGCTCGCCGAATG (BamHI)    |                                   |
| RS946       | GTTTCATGAATTCCTTAATTTTCGGTTTTCGGGTGAC (EcoRI) |                                   |
| RS947       | AAGGAGGGATCCCAATGGTTGCGGTAAGAAGTGAC (BamHI)   |                                   |
| RS948       | GCAAATGAATTCCTAACTCCCGTGCAACCGACGCG (EcoRI)   |                                   |
| RS949       | AGCGGGGGATCCCTTGTATCTGTTTGAAAGCCTG (BamHI)    |                                   |
| RS950       | GTTTCATCTCGAGTTAATTTTCGGTTTTCGGG (XhoI)       |                                   |
| RS951       | GCGGAGGAATTCATGCTTAACCAGCTCG (EcoRI)          |                                   |
| RS952       | ACAGCGGTCGACTCAAGCAGGATGTTTGACGC (Sall)       |                                   |
| RS953       | AATACAGTCGACATGTTCCAGCAAGAAGTTACC (Sall)      |                                   |
| RS954       | GGGAAAGTCGACTTACTCGAGTTCCGCCATC (Sall)        |                                   |
| RS955       | TTGTCAGAGCCTGGTCGCTTACTTGTCTGCCGGAC           |                                   |
| RS956       | GTCCGGCAGACAAGTAAGCGACCAGGCTCTGACAA           |                                   |
| SpoT-F      | GCCACCTACCAGGATATGGA                          | qRT-PCR                           |
| SpoT-R      | GTACGGTCGGCAAGTTTGAT                          |                                   |
| RelA-F      | GAAGATGTGCTGCGTGAGAG                          |                                   |
| RelA-R      | GTACACGTTTCATCTTCCGGC                         |                                   |

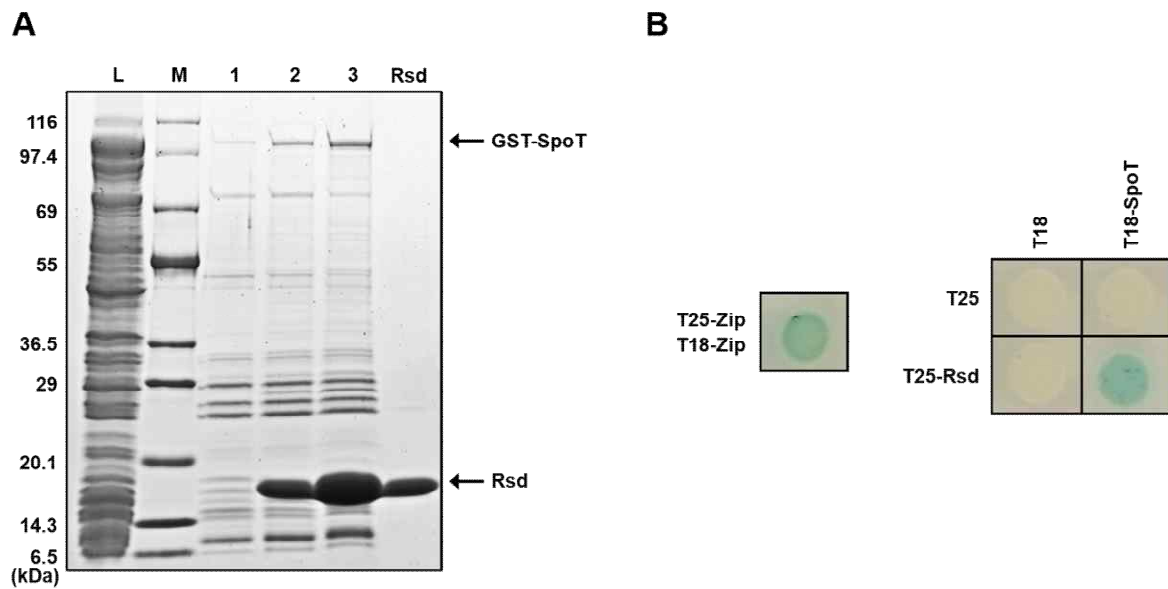

**Fig. S1.** *In vitro* and *in vivo* interaction of Rsd with SpoT. (A) *E. coli* cell extract expressing GST-SpoT was mixed with various amounts of purified Rsd (0, 120, and 360  $\mu$ g in lanes 1-3, respectively), and each mixture was incubated with 50  $\mu$ l of TALON resin for metal affinity chromatography. Proteins bound to the resin were eluted with 2x SDS loading buffer (70  $\mu$ l) and analyzed by SDS-PAGE and stained with Coomassie brilliant blue. Lane L, the *E. coli* cell lysate expressing GST-SpoT; lane M, the molecular mass markers (KOMA Biotech). (B) The bacterial two-hybrid (BACTH) assays to analyze the specific interaction of Rsd with SpoT *in vivo*. *E. coli* strain BTH101 coexpressing the indicated proteins was spotted on LB agar plates supplemented with 40  $\mu$ g/ml X-gal as the color indicator for  $\beta$ -galactosidase activity and incubated at 30°C overnight. Zip, the leucine zipper of *Saccharomyces cerevisiae* GCN4, served as a positive control. The transformant coexpressing the unfused T25- and T18-fragments themselves served as a negative control.

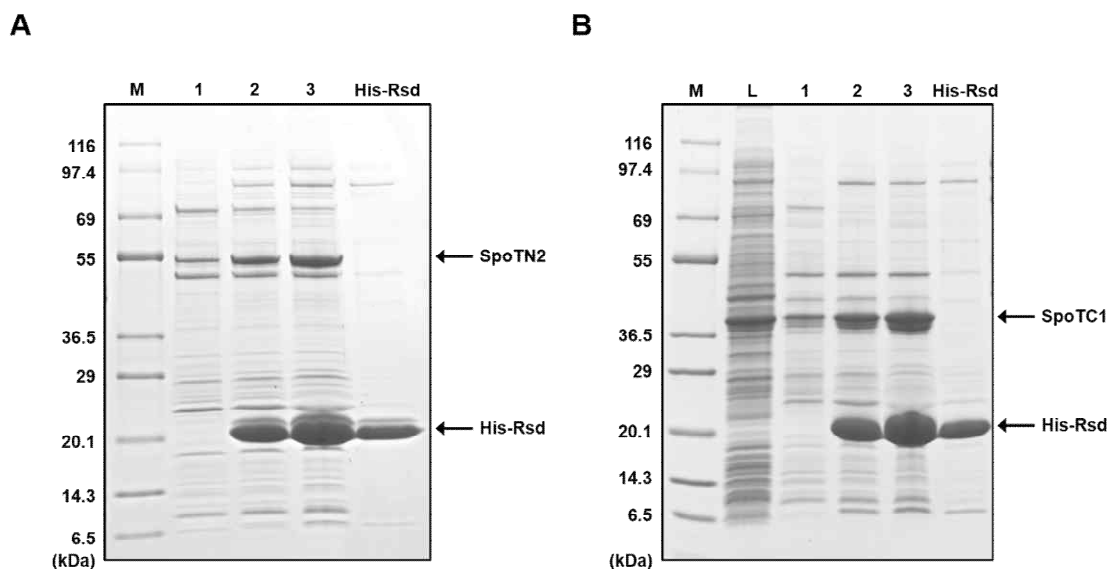

**Fig. S2.** Direct interaction of Rsd with the TGS domain of SpoT. Two truncated forms of SpoT containing the TGS domain, SpoTN2 (*A*) and SpoTC1 (*B*), were expressed in *E. coli*, and crude extracts were mixed with various amounts of purified His-Rsd (0, 120, and 360 μg in lanes 1-3, respectively). Each mixture was incubated with 50 μl TALON resin for metal affinity chromatography. Bound proteins were eluted with 70 μl of 2x SDS sample buffer and analyzed by SDS-PAGE and Coomassie blue staining. Purified His-Rsd was run as a control. Lane M, the molecular mass markers (KOMA Biotech); lane L in panel *B*, the crude cell lysate loaded on the TALON resin.

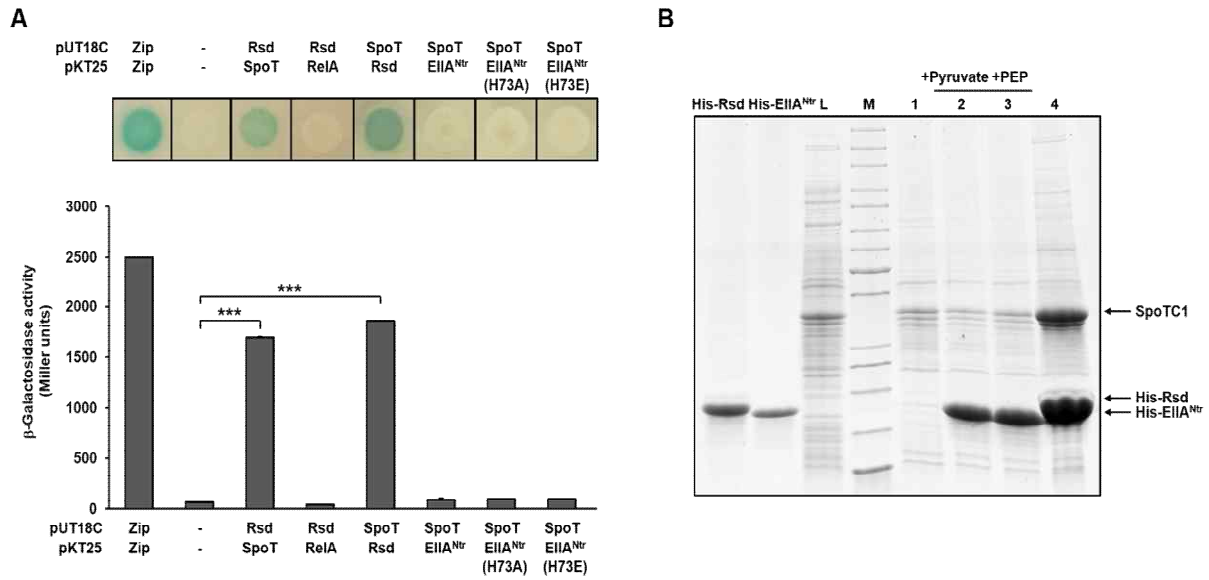

**Fig. S3.** Specific interaction of Rsd with SpoT. (A) *E. coli* strain BTH101 coexpressing the indicated fusion proteins was spotted on LB agar plates supplemented with 40  $\mu\text{g/ml}$  X-gal as the color indicator for  $\beta$ -galactosidase activity and incubated at 30°C overnight.  $\beta$ -Galactosidase activity was measured in strains coexpressing indicated proteins by direct enzyme assay (Miller units). Zip, the leucine zipper domain of *S. cerevisiae* GCN4, served as a positive control. The transformant coexpressing the unfused T25- and T18-fragments served as a negative control. The mean and standard deviation (SD) of three independent measurements are shown. Statistical significance was determined using Student's t-test (\*\*\*,  $P < 0.001$ ). (B) An *E. coli* extract expressing SpoTC1 was mixed with binding buffer (lane 1), 300  $\mu\text{g}$  of purified His-EIIA<sup>Ntr</sup> in the presence of 1 mM pyruvate (lane 2) or 1 mM PEP (lane 3), and 300  $\mu\text{g}$  of purified His-Rsd (lane 4). Each mixture was incubated with 50  $\mu\text{l}$  of TALON resin for metal affinity chromatography. Proteins bound to the resin were eluted with 2x SDS loading buffer (70  $\mu\text{l}$ ) and analyzed by SDS-PAGE and stained with Coomassie brilliant blue. Lane L, the *E. coli* extract expressing SpoTC1; lane M, the molecular mass markers (Thermo Fisher Scientific).

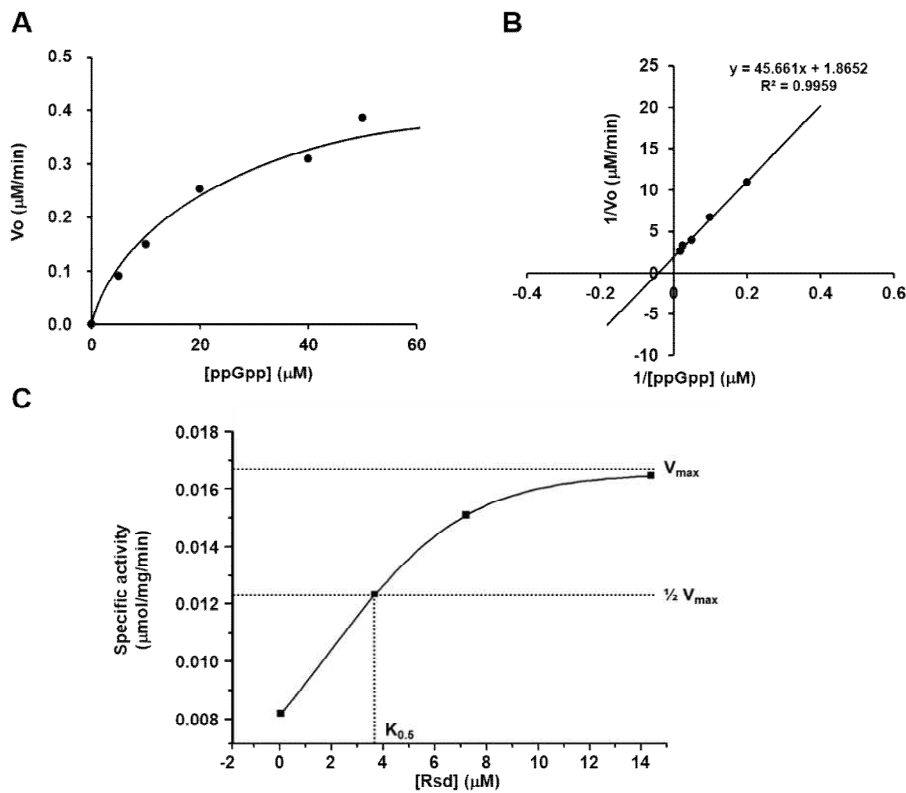

**Fig. S4.** Kinetic characterization of SpoT ppGpp hydrolase activity. (A) The ppGpp hydrolase activity of purified GST-SpoT (0.4  $\mu\text{M}$ ) was assayed in reaction mixtures containing various amounts of ppGpp. After incubation at 37°C for 7 min, reactions were stopped by the addition of formic acid to ~ 3%, then trifluoroacetic acid was added to a final concentration of 10%. The reaction products were analyzed by HPLC as described in *Materials and Methods*. The initial velocity of ppGpp hydrolysis (or GDP production) was plotted as a function of ppGpp concentration. Representative data from two independent experiments are shown. The data were fitted to Michaelis-Menten kinetics. (B) A Lineweaver-Burk plot of the data in panel A. (C) Concentration-dependent stimulation of the ppGpp hydrolase activity of SpoT by Rsd. The ppGpp hydrolase activity of purified GST-SpoT (0.4  $\mu\text{M}$ ) was assayed in reaction mixtures containing 30  $\mu\text{M}$  ppGpp and various amounts of purified Rsd (0, 3.7, 7.3, and 14.6  $\mu\text{M}$ ). Reactions were processed and analyzed as described in panel A. Non-linear regression fits of experimental data were performed using Origin software. The concentration of Rsd required for half-maximum stimulation of the ppGpp hydrolase activity ( $K_{0.5}$ ) was 3.65  $\mu\text{M}$ . Representative data from two independent experiments are shown.



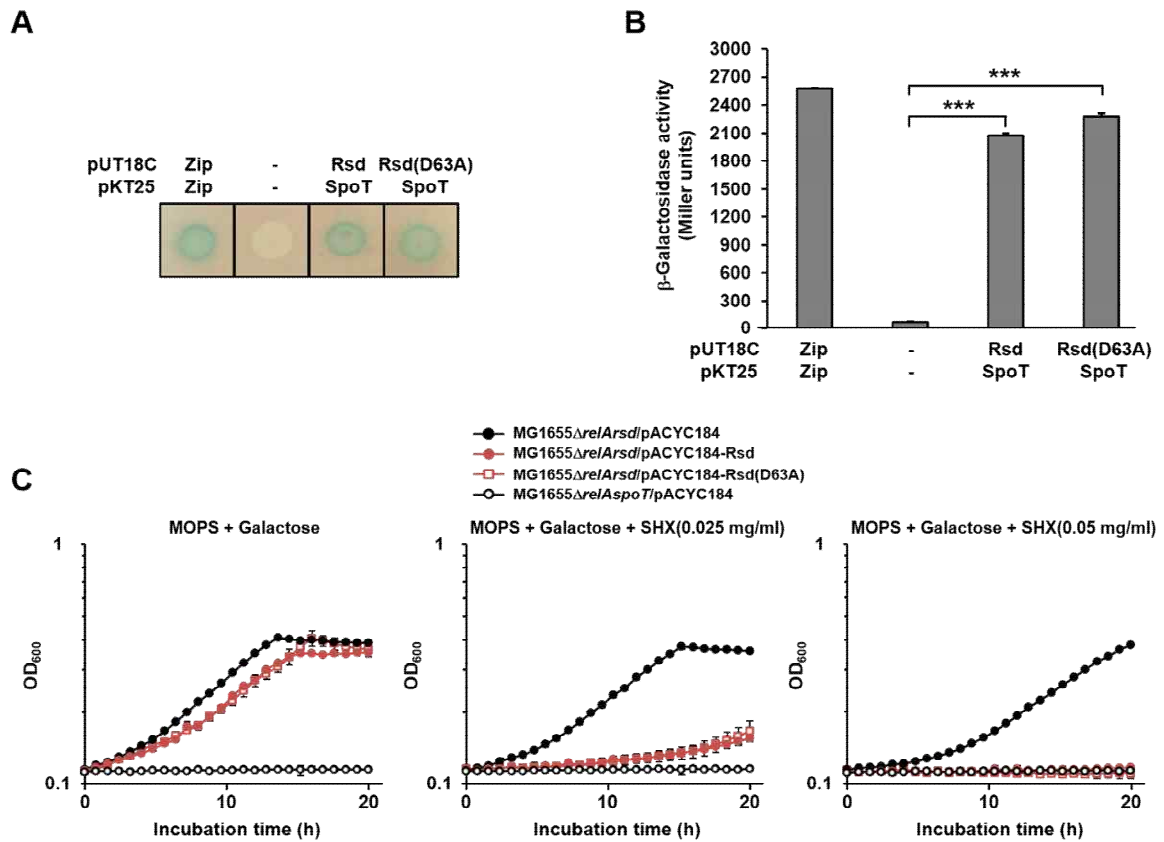

**Fig. S5.** Complex formation with SpoT and activation of the (p)ppGpp hydrolase activity of SpoT are independent of the anti- $\sigma^{70}$  activity of Rsd. (A and B) The bacterial two-hybrid assays to analyze the specific interaction of Rsd and Rsd(D63A) with SpoT *in vivo*. *E. coli* BTH101 coexpressing T25-SpoT and T18-Rsd or T18-Rsd(D63A) was spotted on LB plates supplemented with 40  $\mu$ g/ml X-gal (A) and  $\beta$ -galactosidase activity was monitored by direct enzyme assay (Miller units) (B). Zip served as a positive control. The transformant coexpressing the unfused T25- and T18-fragments served as a negative control. The mean and standard deviation (SD) of three independent measurements are shown. Statistical significance was determined using Student's t-test (\*\*\*,  $P < 0.001$ ). (C) Growth curves of *E. coli* strains in MOPS minimal medium (pH 7.2) supplemented with 0.2% galactose with or without SHX. After inoculation, 100- $\mu$ l aliquots of each strain were transferred into a 96-well plate and growth was monitored at 600 nm using a multimode microplate reader (TECAN). The mean and standard deviation (SD) of three measurements are shown.

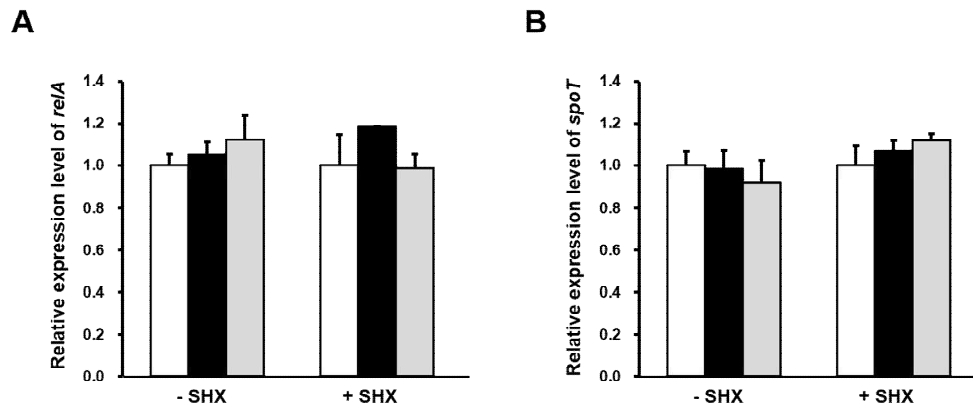

**Fig. S6.** The effect of Rsd on the transcription of *relA* and *spoT*. (A and B) The relative transcript levels of *relA* (A) and *spoT* (B) were determined by quantitative reverse transcriptase PCR (qRT-PCR). *E. coli* cells were grown in LB medium containing appropriate antibiotics and 0.02% arabinose. At OD<sub>600</sub> ~0.6, each culture was divided into two parts and SHX (0.5 mg/ml) was added to one of them. After 30-min incubation, cells were harvested and total RNA was prepared using MiniBEST Universal RNA Extraction Kit (Takara Bio). Genomic DNA was removed using RNase-free DNase I (Promega). The same amount of RNA (2500 ng) from each culture was converted into cDNA using cDNA EcoDry<sup>TM</sup> Premix (Takara Bio). cDNAs were diluted 20-fold and subjected to qRT-PCR analyses using gene-specific primers and SYBR Premix Ex Taq II (Takara Bio). Amplification and detection of specific products were performed using the CFX96 Real-Time System (Bio-Rad). For normalization of the transcript level, the *rrsG* gene was used as a reference. The relative expression level was calculated as the difference between the threshold cycle (Ct) of the target gene and the Ct of the reference gene for each template. The mean and standard deviation (SD) of three independent measurements are shown. MG1655/pJK1113, white; MG1655 $\Delta$ *rsd*/pJK1113, black; MG1655 $\Delta$ *rsd*/pJK1113-Rsd, gray.

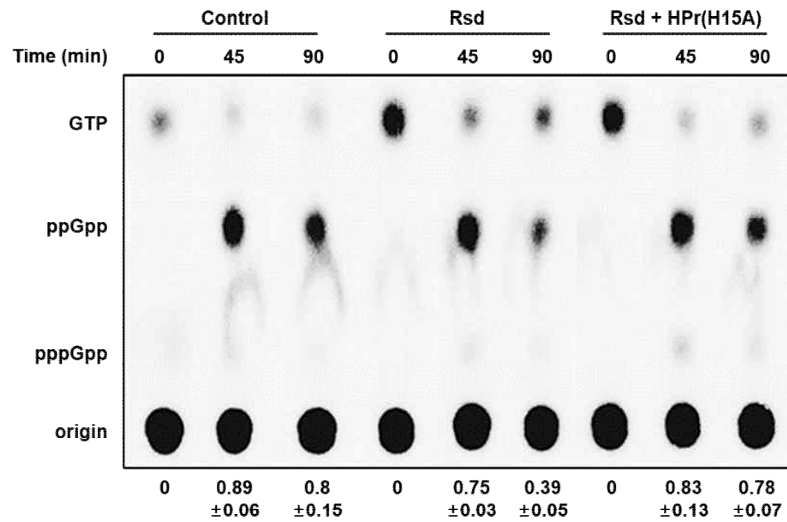

**Fig. S7.** Dephosphorylated form of HPr abolishes the stimulatory effect of Rsd on the (p)ppGpp hydrolase activity of SpoT. The MG1655 $\Delta$ *rsd* strain carrying pJK1113 (Control), pJK1113-Rsd (Rsd), or both pJK1113-Rsd and pJK1113-H15A (Rsd + HPr(H15A)) was incubated in low-phosphate MOPS minimal medium containing 0.2% galactose and 0.02% arabinose and 100  $\mu$ Ci/ml  $^{32}$ P $O_4^{3-}$ . Exponentially growing cells were treated with SHX (1 mg/ml) and intracellular (p)ppGpp concentrations were analyzed by TLC at three time points (indicated above each lane). Relative amounts of (p)ppGpp were calculated as the intensity of (p)ppGpp divided by that of (p)ppGpp plus GTP. The mean and standard deviation (SD) of three independent measurements are shown below each lane.

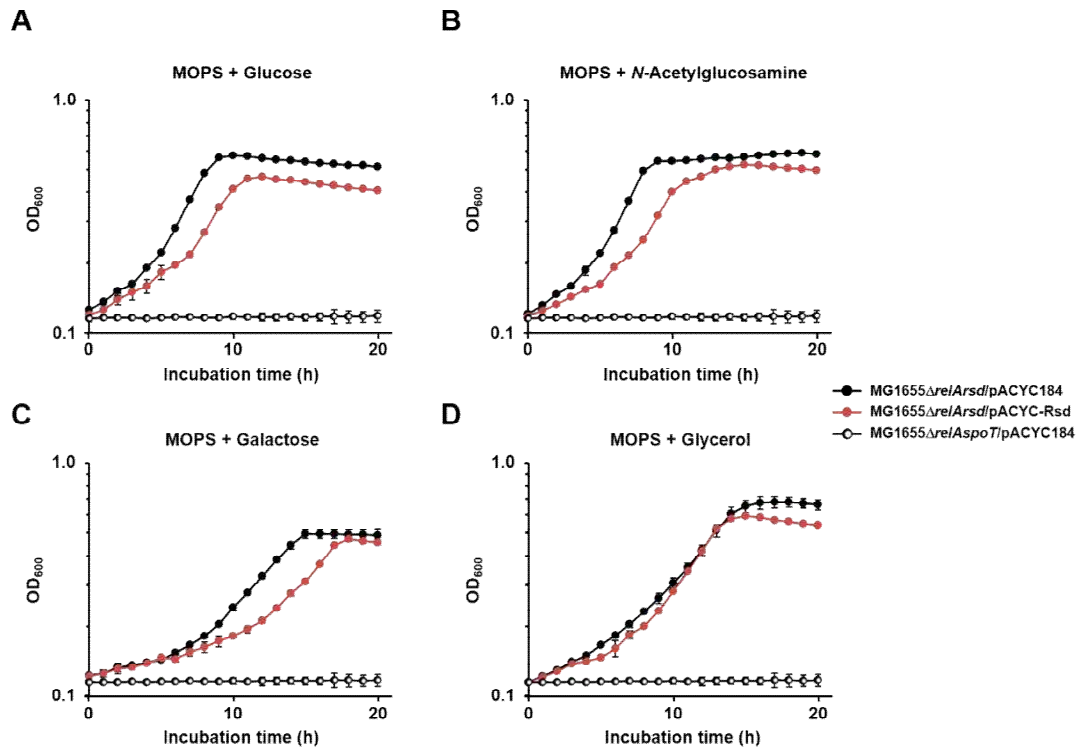

**Fig. S8.** Growth curves of *E. coli* strains in MOPS minimal medium containing different carbon sources. Each strain was inoculated in MOPS minimal medium (pH 7.2) supplemented with 0.2% glucose (A), *N*-acetylglucosamine (B), galactose (C), or glycerol (D). After inoculation, 100- $\mu$ l aliquots of each strain were transferred into a 96-well plate and growth was monitored at 37°C by measuring the OD<sub>600</sub> in multimode microplate reader (TECAN). The mean and standard deviation (SD) of three measurements are shown.

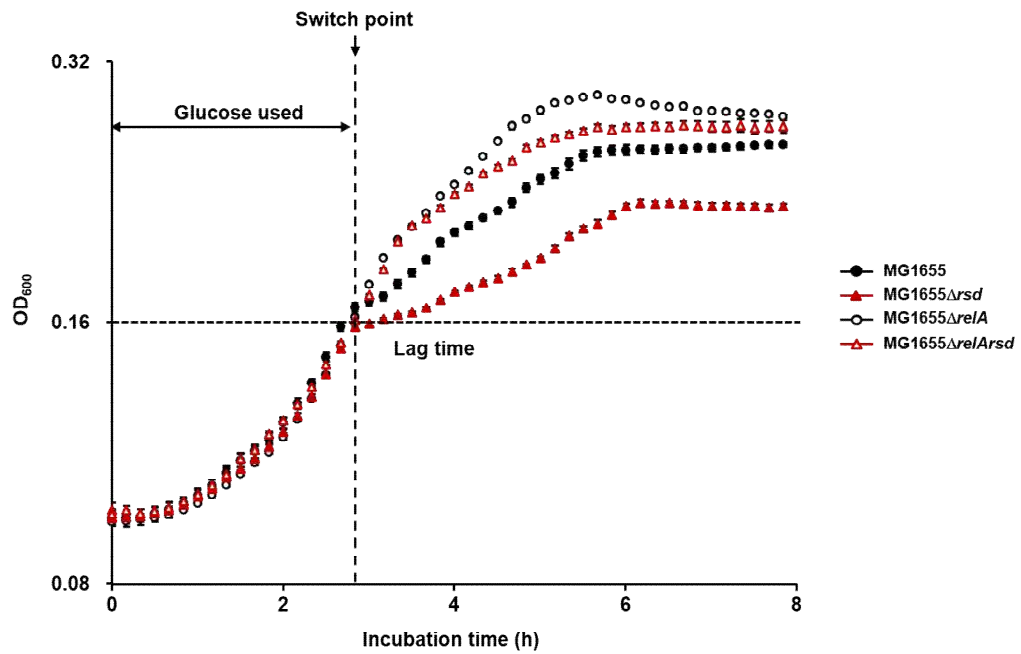

**Fig. S9.** Rsd is required to counterbalance RelA-mediated (p)ppGpp accumulation during a carbon source downshift. *E. coli* strains grown overnight in LB medium were harvested, washed, and then suspended in MOPS minimal medium containing 0.1% casamino acids and 0.02% glucose. After inoculation, 100- $\mu$ l aliquots of each strain were transferred into a 96-well plate and growth was monitored at 600 nm using a multimode microplate reader (TECAN). The mean and standard deviation (SD) of three measurements are shown.

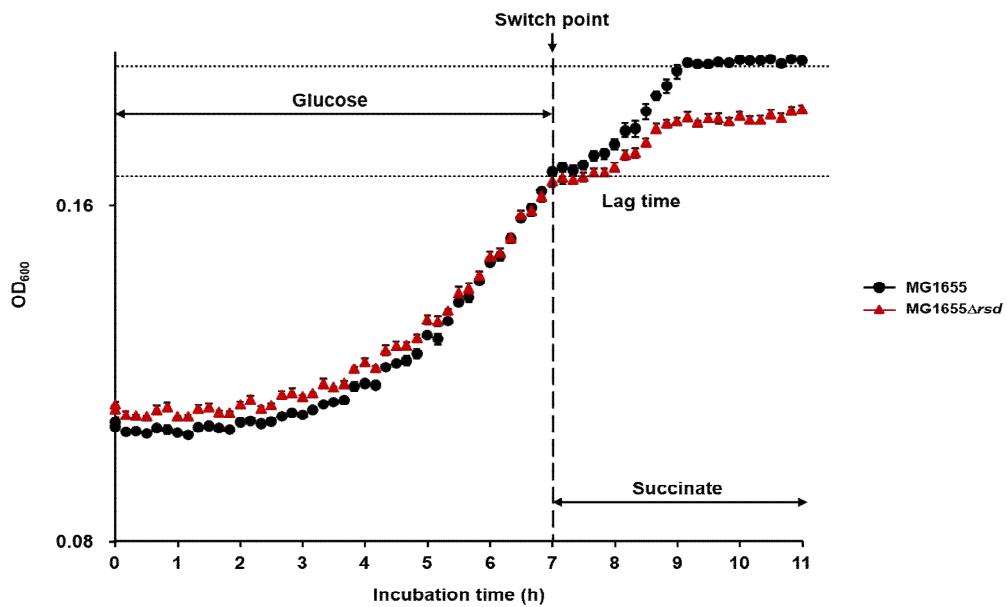

**Fig. S10.** Rsd is involved in the response to a carbon source downshift. *E. coli* strains grown overnight in LB medium were harvested, washed, and then suspended in MOPS minimal medium containing 0.04% glucose and 0.08% succinate. After inoculation, 100- $\mu$ l aliquots of each strain were transferred into a 96-well plate and growth was monitored at 600 nm using a multimode microplate reader (TECAN). The mean and standard deviation (SD) of three measurements are shown.

## Supplementary References

1. Blattner FR, *et al.* (1997) The complete genome sequence of *Escherichia coli* K-12. *Science* 277(5331):1453-1462.
2. Karimova G, Ullmann A, & Ladant D (2000) A bacterial two-hybrid system that exploits a cAMP signaling cascade in *Escherichia coli*. *Methods Enzymol* 328:59-73.
3. Park YH, Lee CR, Choe M, & Seok YJ (2013) HPr antagonizes the anti- $\sigma^{70}$  activity of Rsd in *Escherichia coli*. *Proc Natl Acad Sci U S A* 110(52):21142-21147.
4. LaVallie ER, *et al.* (1993) A thioredoxin gene fusion expression system that circumvents inclusion body formation in the *E. coli* cytoplasm. *Biotechnology (N Y)* 11(2):187-193.
5. Karimova G, Pidoux J, Ullmann A, & Ladant D (1998) A bacterial two-hybrid system based on a reconstituted signal transduction pathway. *Proc Natl Acad Sci U S A* 95(10):5752-5756.
6. Karimova G, Ullmann A, & Ladant D (2001) Protein-protein interaction between *Bacillus stearothermophilus* tyrosyl-tRNA synthetase subdomains revealed by a bacterial two-hybrid system. *J Mol Microbiol Biotechnol* 3(1):73-82.
7. Karimova G, Dautin N, & Ladant D (2005) Interaction network among *Escherichia coli* membrane proteins involved in cell division as revealed by bacterial two-hybrid analysis. *J Bacteriol* 187(7):2233-2243.
8. Park S, Park YH, Lee CR, Kim YR, & Seok YJ (2016) Glucose induces delocalization of a flagellar biosynthesis protein from the flagellated pole. *Mol Microbiol* 101(5):795-808.

9. Datsenko KA & Wanner BL (2000) One-step inactivation of chromosomal genes in *Escherichia coli* K-12 using PCR products. *Proc Natl Acad Sci U S A* 97(12):6640-6645.
10. Reddy P, Peterkofsky A, & McKenney K (1989) Hyperexpression and purification of *Escherichia coli* adenylate cyclase using a vector designed for expression of lethal gene products. *Nucleic Acids Res* 17(24):10473-10488.
11. Lee CR, *et al.* (2005) Requirement of the dephospho-form of enzyme IIA<sup>Ntr</sup> for derepression of *Escherichia coli* K-12 *ilvBN* expression. *Mol Microbiol* 58(1):334-344.
12. Choe M, Park YH, Lee CR, Kim YR, & Seok YJ (2017) The general PTS component HPr determines the preference for glucose over mannitol. *Sci Rep* 7:43431.
13. Chang AC & Cohen SN (1978) Construction and characterization of amplifiable multicopy DNA cloning vehicles derived from the P15A cryptic miniplasmid. *J Bacteriol* 134(3):1141-1156.
